# Supplementary material for: Self-assembled micelles of PEG–poly(disulfide carbamate amine) copolymers for intracellular dual-responsive drug delivery
Source: Royal Society of Chemistry journal article supplement (doi:10.1039/c5tb01770j), 2015-12-23
Supplement: c5tb01770j1.pdf [file c5tb01770j1.pdf]

Supporting information

## **Self-assembled Micelles of PEG-Poly(Disulfide Carbamate Amine) Copolymers for Intracellular Dual-Responsive Drug Delivery**

Chao Lin<sup>a\*</sup>, Bo Lou<sup>a</sup>, Jie Zhao<sup>a</sup>, Rong Jin<sup>b</sup>, Peng Zhao<sup>a</sup>, Jianbo Li<sup>c</sup>, and Jie Ren<sup>c</sup>

<sup>a</sup> Shanghai East Hospital, The Institute for Biomedical Engineering and Nanoscience, Tongji University School of Medicine, Tongji University, Shanghai 200092, PR China.

<sup>b</sup> Institute of Nanochemistry and Nanobiology, Shanghai University, Shanghai 200444, PR China.

<sup>c</sup> Institute of Nano and Biopolymeric Materials, School of Materials Science and Engineering, Tongji University, 4800 Caoan Road, Shanghai, 201804, P.R. China.

Tel: 0086-21-65988029; Fax: 0086-21-65983706-0;

\* Corresponding authors.

E-mail: chaolin@tongji.edu.cn

## 1. $^1\text{H}$ NMR spectra of PEG-SSPUA copolymers

### a) PEG-SSMDE

$^1\text{H}$  NMR ( $\text{D}_2\text{O}$ )  $\delta$  (ppm) = 4.33 ( $\text{SSCH}_2\text{CH}_2$ ); 3.65 ( $\text{CH}_2\text{CH}_2\text{O}$ ); 3.55 ( $\text{OCONHCH}_2$ ); 3.38 ( $\text{CH}_2\text{N}(\text{CH}_3)\text{CH}_2$ ); 3.00 ( $\text{CH}_2\text{N}(\text{CH}_3)\text{CH}_2$ ); 2.95 ( $\text{SSCH}_2\text{CH}_2$ ).

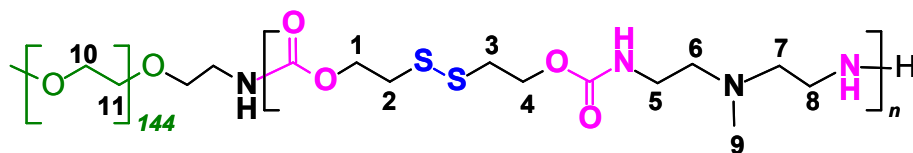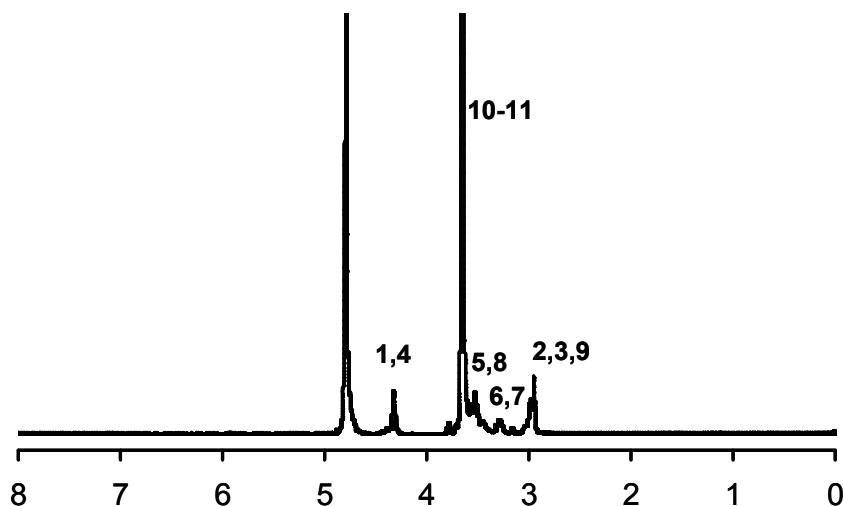

### b) PEG-SSPDA

$^1\text{H}$  NMR ( $\text{D}_2\text{O}$ )  $\delta$  (ppm) = 4.32 ( $\text{SSCH}_2\text{CH}_2$ ); 3.76 ( $\text{NCH}_2\text{CH}_2\text{N}$ ); 3.65 ( $\text{CH}_2\text{CH}_2\text{O}$ ); 3.57 ( $\text{OCONHCH}_2$ ); 3.45 ( $\text{OCONHCH}_2\text{CH}_2$ ); 2.97 ( $\text{SSCH}_2\text{CH}_2$ ).

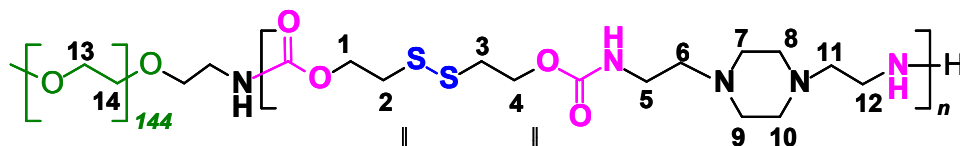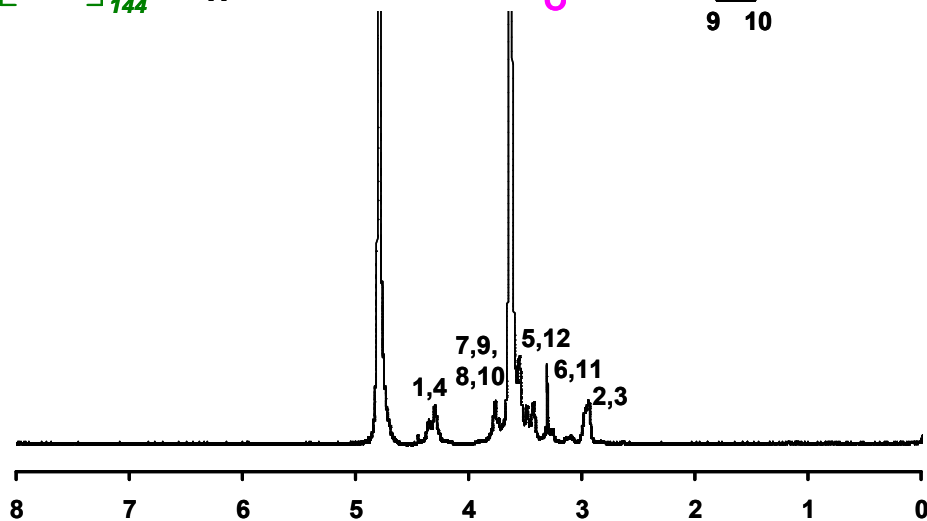

c) PEG-SSBAP

$^1\text{H}$  NMR ( $\text{D}_2\text{O}$ , ppm):  $\delta$  4.30 ( $\text{SSCH}_2\text{CH}_2$ ), 3.65 ( $\text{CH}_2\text{CH}_2\text{O}$ ); 3.4-4.0 ( $\text{NCH}_2\text{CH}_2\text{N}$ ), 3.31 ( $\text{OCONHCH}_2$ ), 3.21 ( $\text{OCONHCH}_2\text{CH}_2$ ), 2.95 ( $\text{SSCH}_2\text{CH}_2$ ), 1.95 ( $\text{CH}_2\text{CH}_2\text{CH}_2$ ).

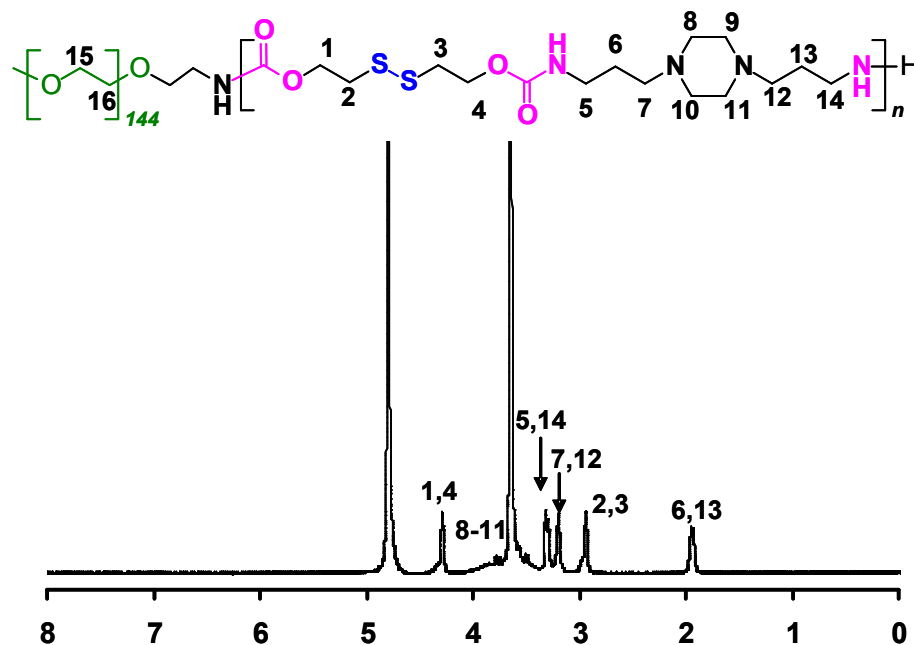

Figure S1.  $^1\text{H}$  NMR spectra analysis of PEG-SSPCA copolymers. a) PEG-SSMDE; b) PEG-SSPDA; c) PEG-SSBAP.

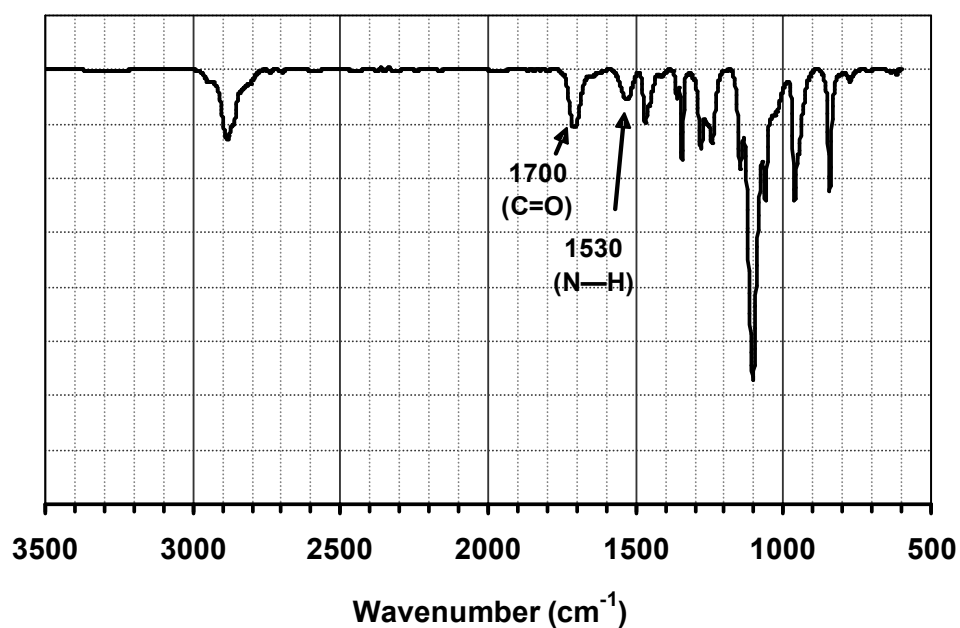

Figure S2. FT-IR spectrum of PEG-SSBAP copolymers showing characteristic peak of carbamate linkage.

### 3. GPC of PEG-SSPCA copolymers

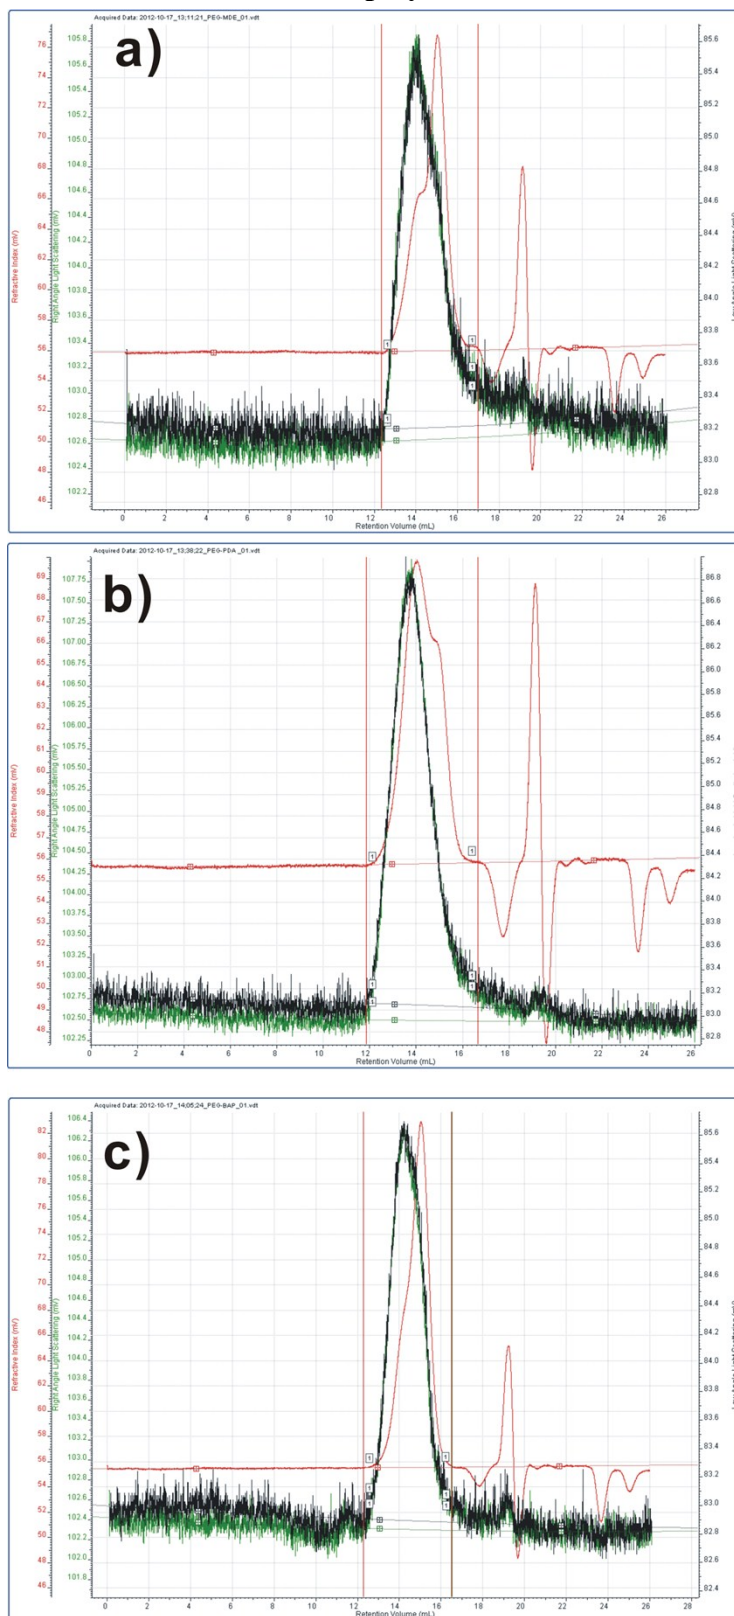

Figure S3. GPC curve of PEG-SSPCA copolymers. a) PEG-SSMDE; b) PEG-SSPDA; c) PEG-SSBAP.

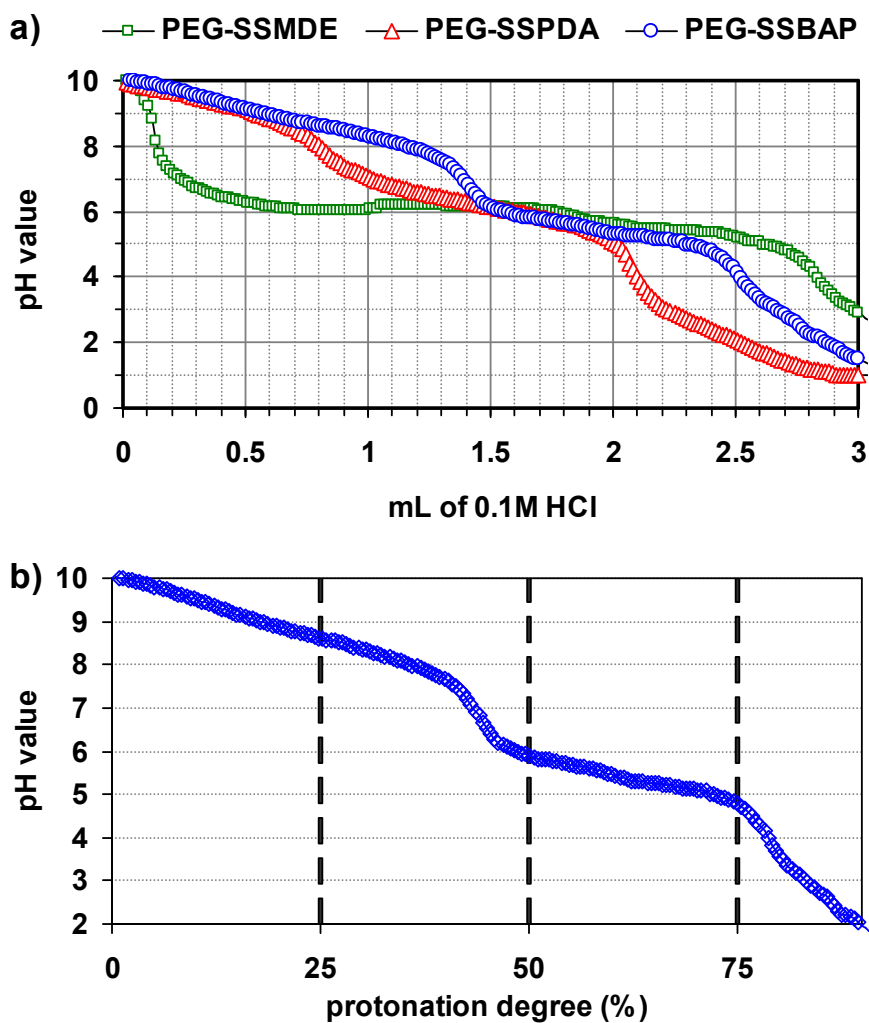

**Figure S4.** a) Acid-base titration curve of PEG-PCA copolymers; b) Acid-base titration of PEG-SSBAP copolymer gives pH value as the function of apparent protonation degree of tertiary amines in PEG-SSBAP copolymer.

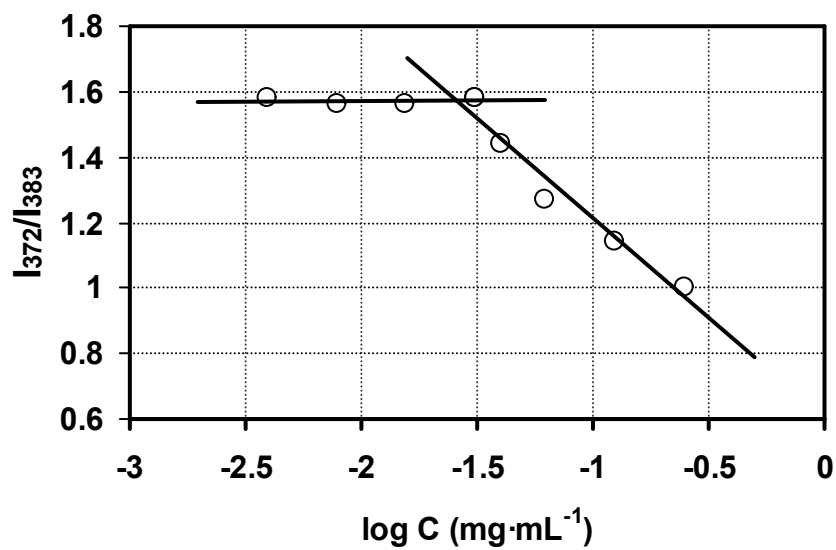

**Figure S5.** The ratio of fluorescence intensity at 372 and 383 nm (from pyrene excitation spectra) as a function of the concentrations of PEG-SSBAP.

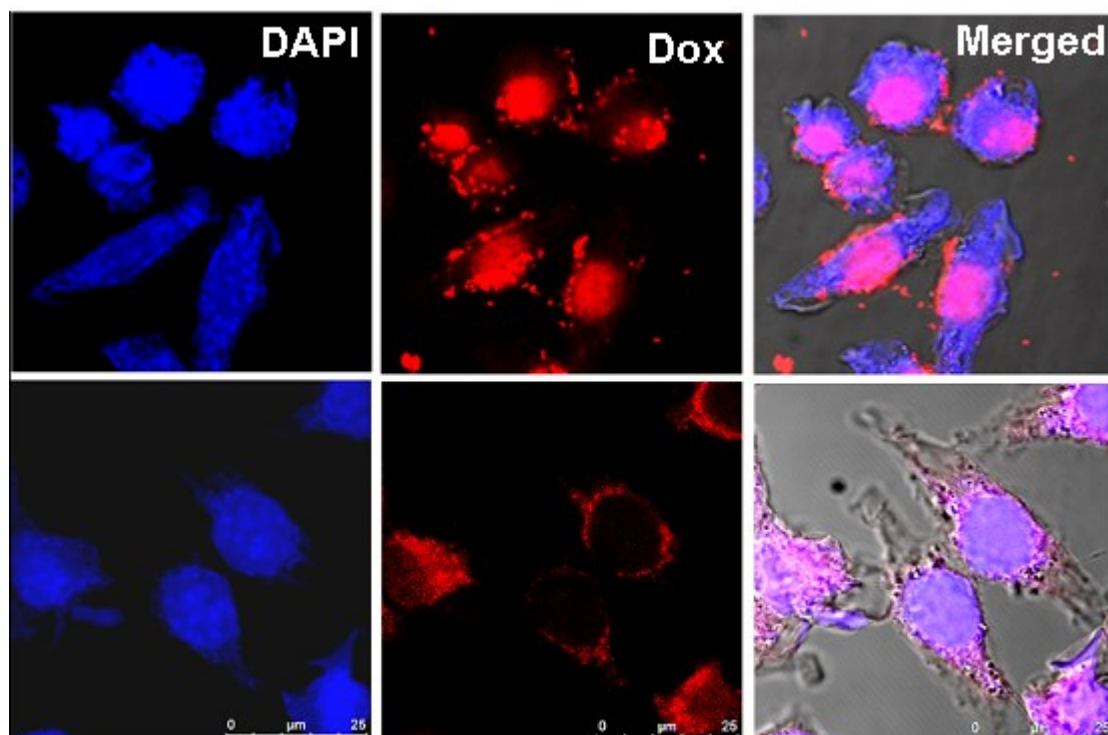

**Figure S6.** CLSM observation of intracellular distribution of Dox 1 h after incubating free Dox (up) or Dox-loaded PEG-SSBAP micelles (down) with SKOV-3 cells.

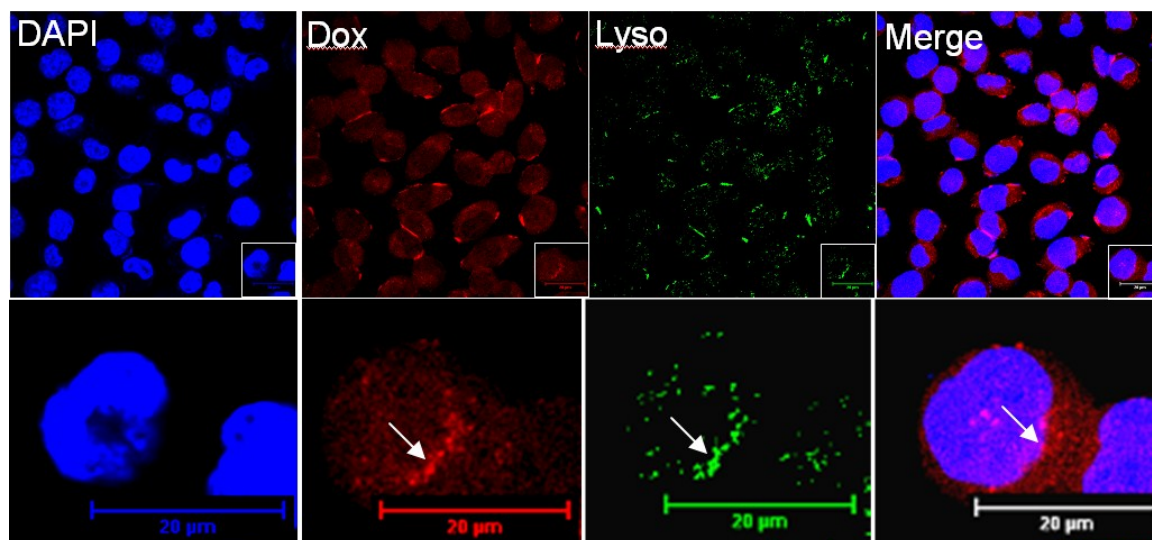

**Figure S7.** CLSM observation of intracellular location of Dox 4 h after incubating Dox-loaded PEG-SSBAP micelles with MCF-7 cells. This figure indicates Dox-loaded micelles (in red) locate in the lysosomes (in green) stained by LysoTracker green DND26 (Lyso). The cellular nucleus in blue is stained by DAPI. The arrow shows the co-localization of Dox-loaded micelles and lysosome.

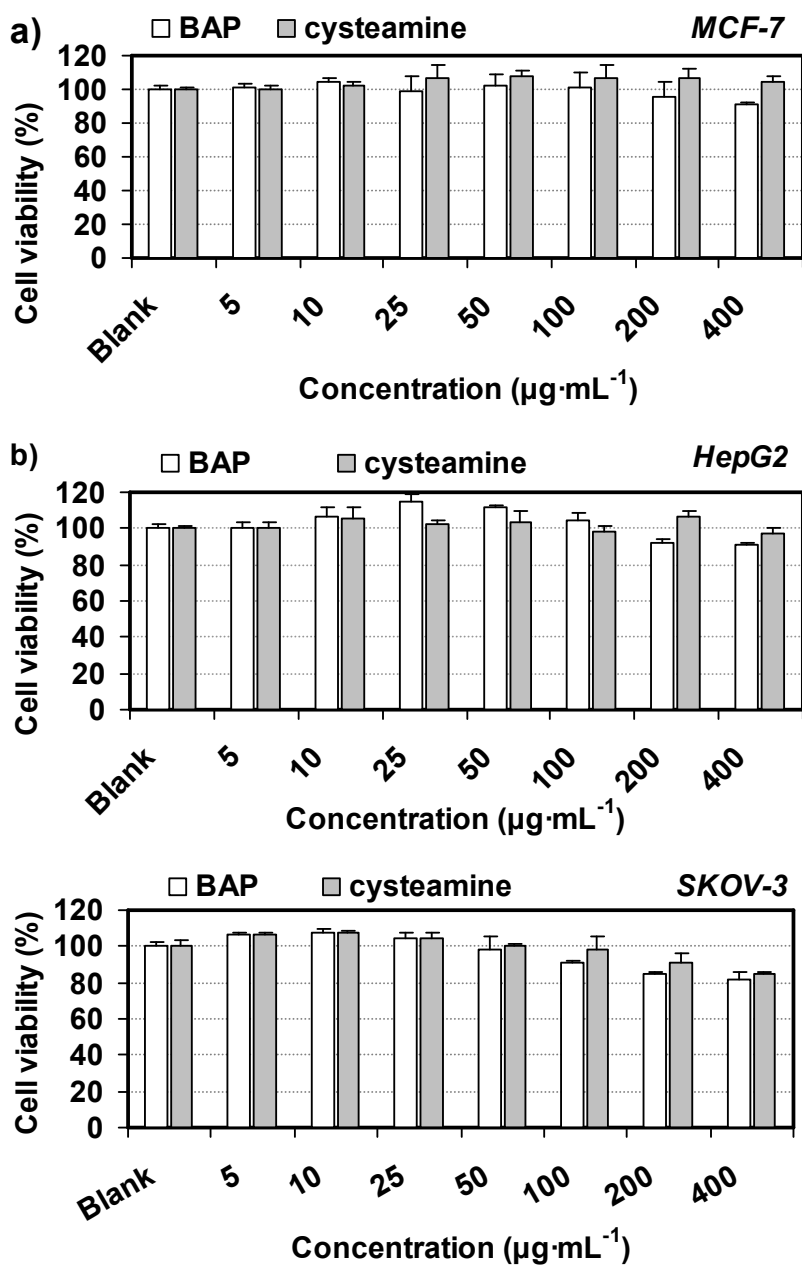

**Figure S8.** Cytotoxicity of BAP and cysteamine, as degradation products from PEG-SSBAP, at varied concentration from 5 to 400  $\mu\text{g}\cdot\text{mL}^{-1}$  against three types of cell lines: a) MCF-7, b) HepG2 and c) SKOV-3 cells. PBS group was used as a blank control and set as 100% cell viability.



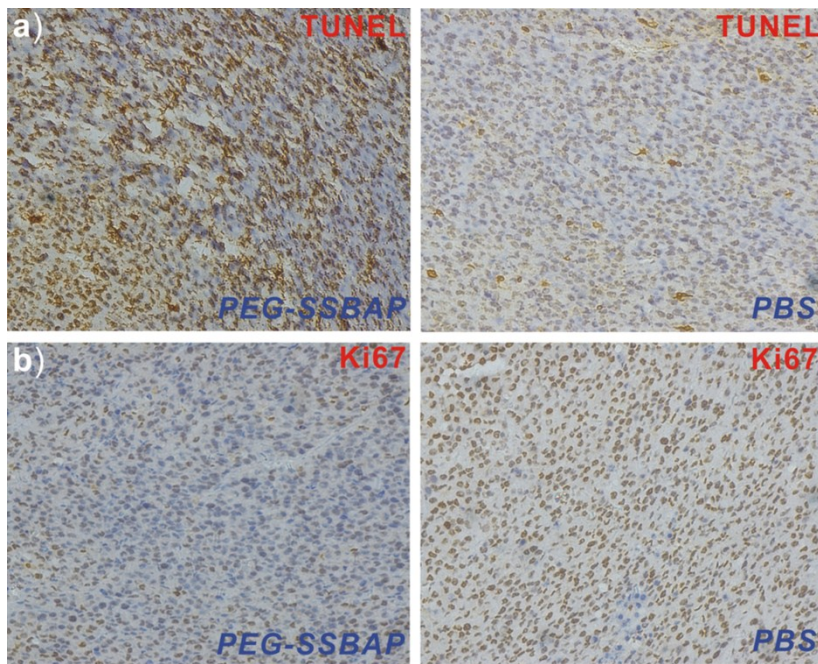

**Figure S9.** TUNEL (a) and Ki67 (b) staining of tumor section of the mice 28 day after chemotherapy using Dox-loaded PEG-SSBAP micelles. PBS group was used as a positive control.

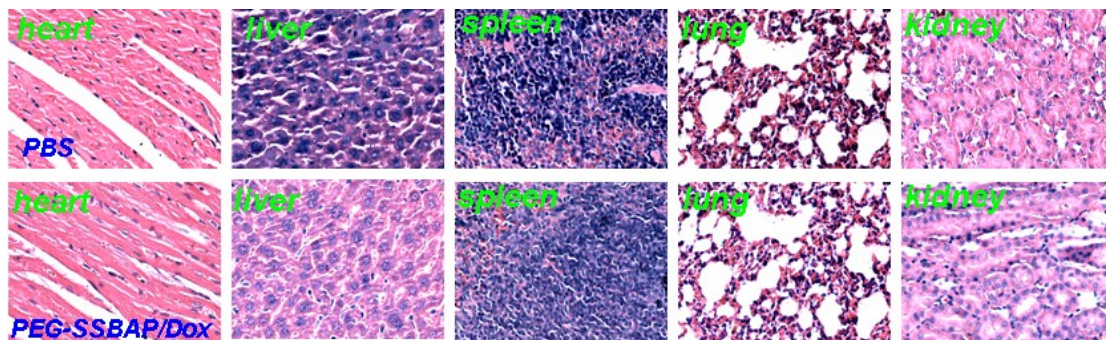

**Figure S10.** H&E staining of other organ section of the mice 28 day after chemotherapy using Dox-loaded PEG-SSBAP micelles. PBS group was used as a control.
